# Supplementary material for: A highly sensitive ratiometric fluorescent probe for imaging endogenous hydrogen sulfide in cells
Source: Royal Society of Chemistry journal article supplement (doi:10.1039/d0nj04786d), 2020-01-01

## A High-Sensitive Ratiometric Fluorescent Probe for Imaging Endogenous Hydrogen Sulfide in Cells

Baoshuai An, Hongyi Zhang, Junli Peng, Wei Zhu, Ningning Wei\* and Yanru Zhang\*

Department of Pharmacology and Medicinal Chemistry, Qingdao University School of Pharmacy, Qingdao 266021, China

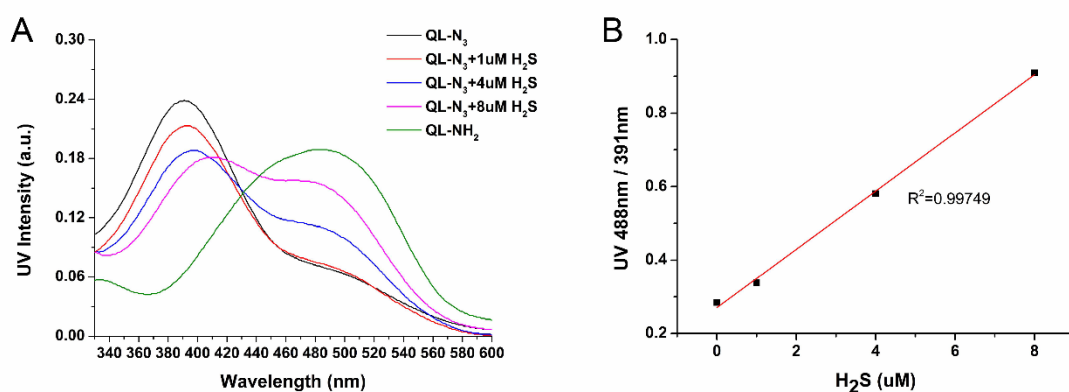

Fig .S1 (A) UV absorption spectra of QL-NH<sub>2</sub> (10 μM), QL-N<sub>3</sub> (10 μM) reacting with hydrogen sulfide (0 μM, 1 μM, 4 μM, 8 μM). (B) The relationship between I<sub>605 nm</sub> / I<sub>525 nm</sub> and the concentration of H<sub>2</sub>S.

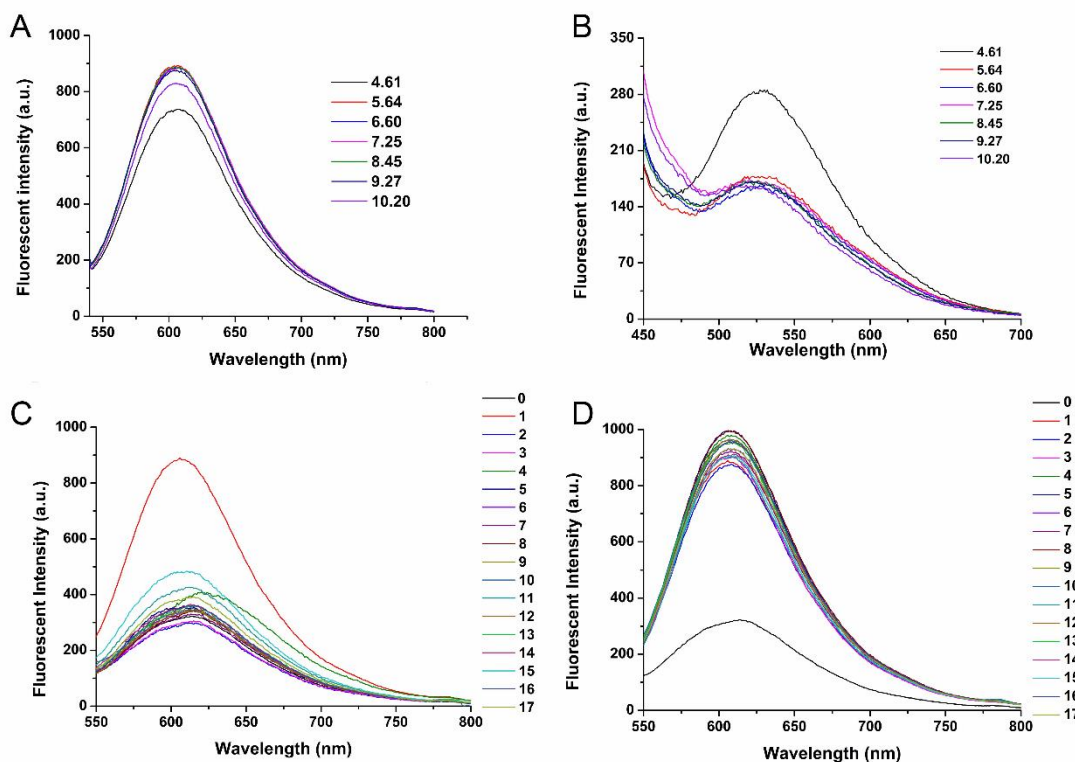

Fig .S2 (A) After excitation at 385 nm, the pH stability of fluorescence emission intensity of QL-N<sub>3</sub> (10 μM) and hydrogen sulfide (10 μM) at 525 nm. (B) After excitation at 385 nm, the pH stability of fluorescence emission intensity of free QL-N<sub>3</sub> (10 μM) at 525 nm. (C) Fluorescence emission spectrum of QL-N<sub>3</sub> selective test for potential interference factors (Ex: 521 nm). (D) Fluorescence emission spectrum of interference test of QL-N<sub>3</sub> and hydrogen sulfide on potential interference factors (Ex: 385 nm).

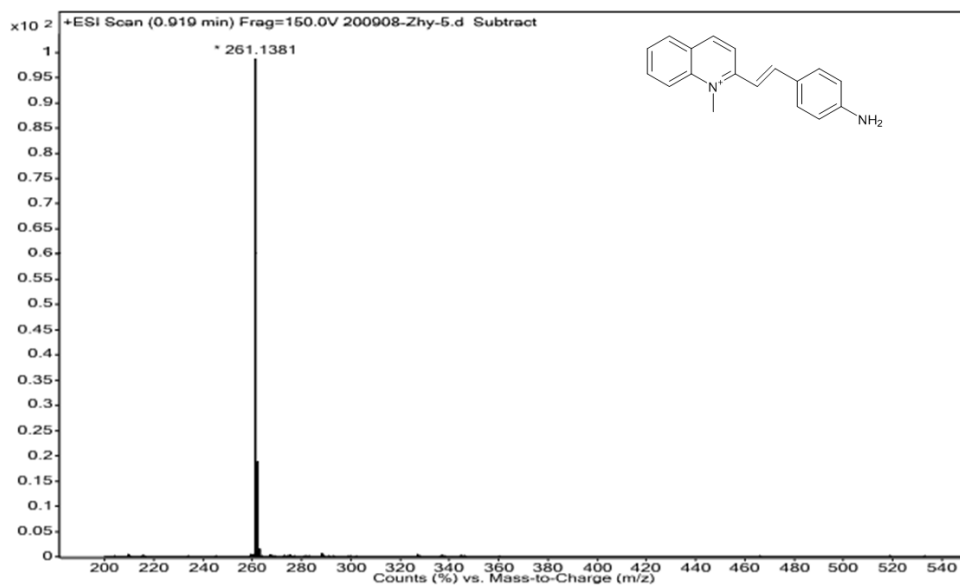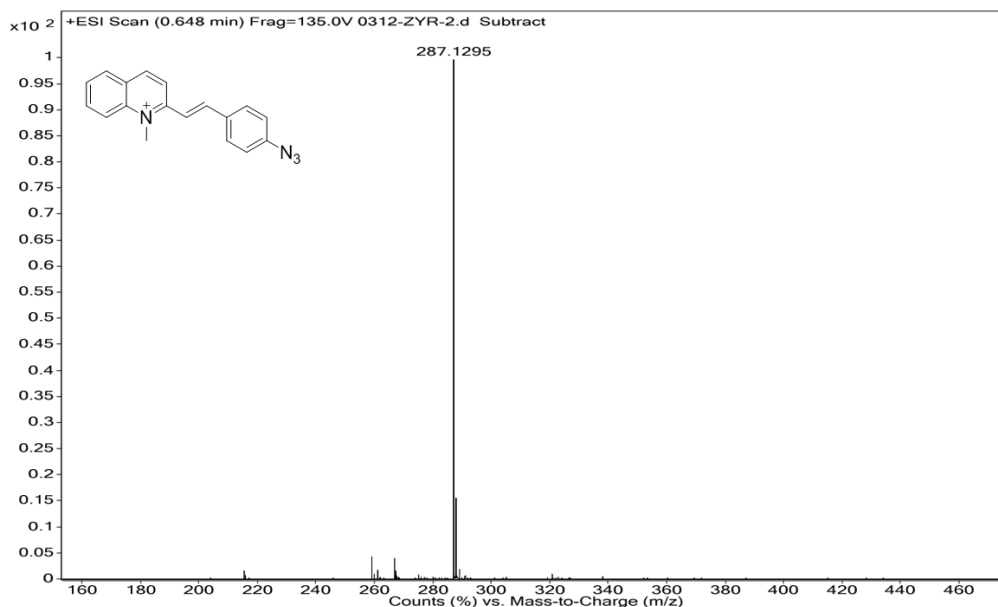

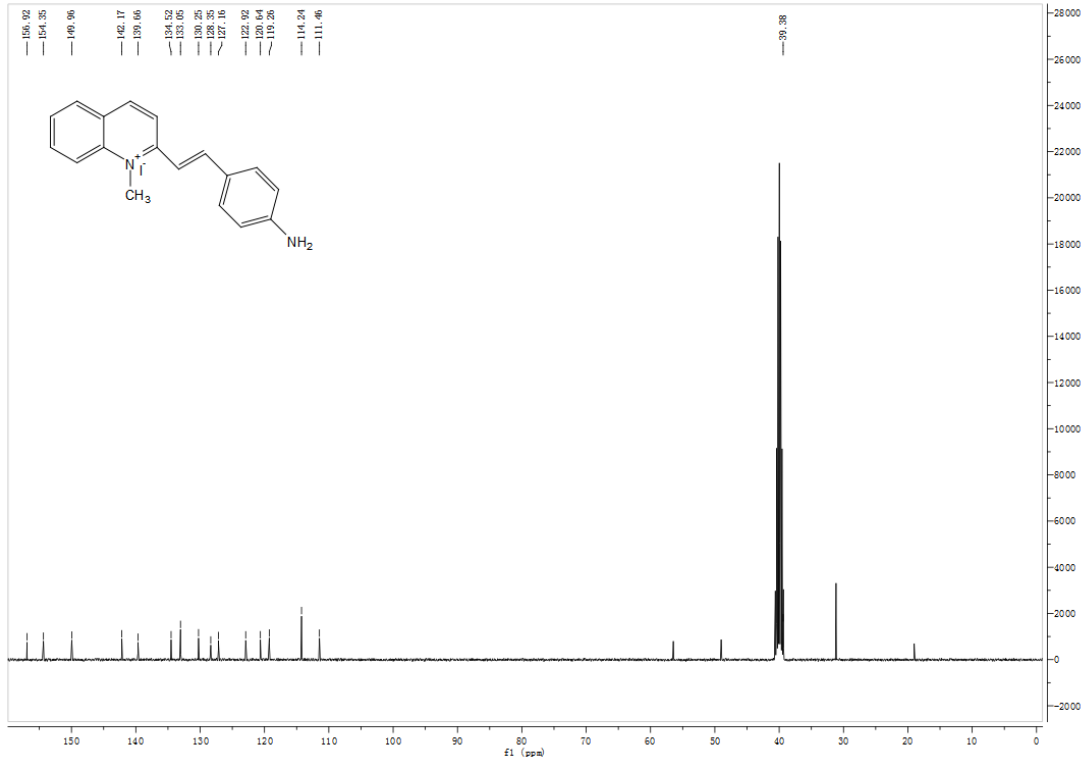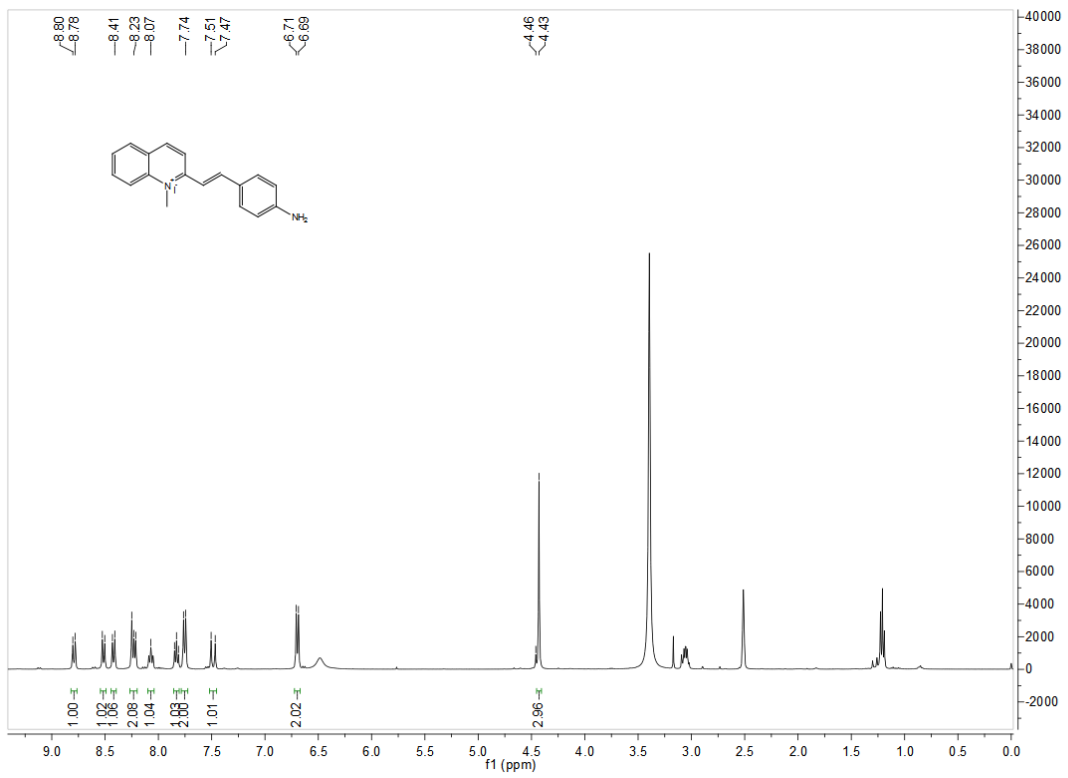

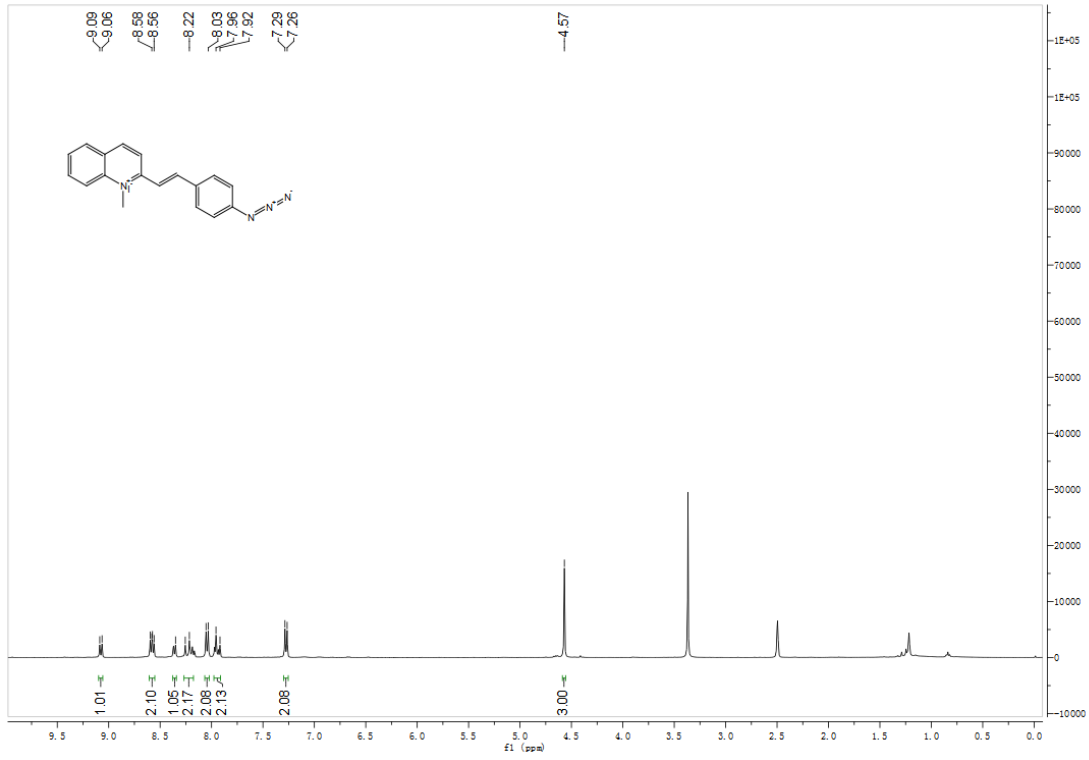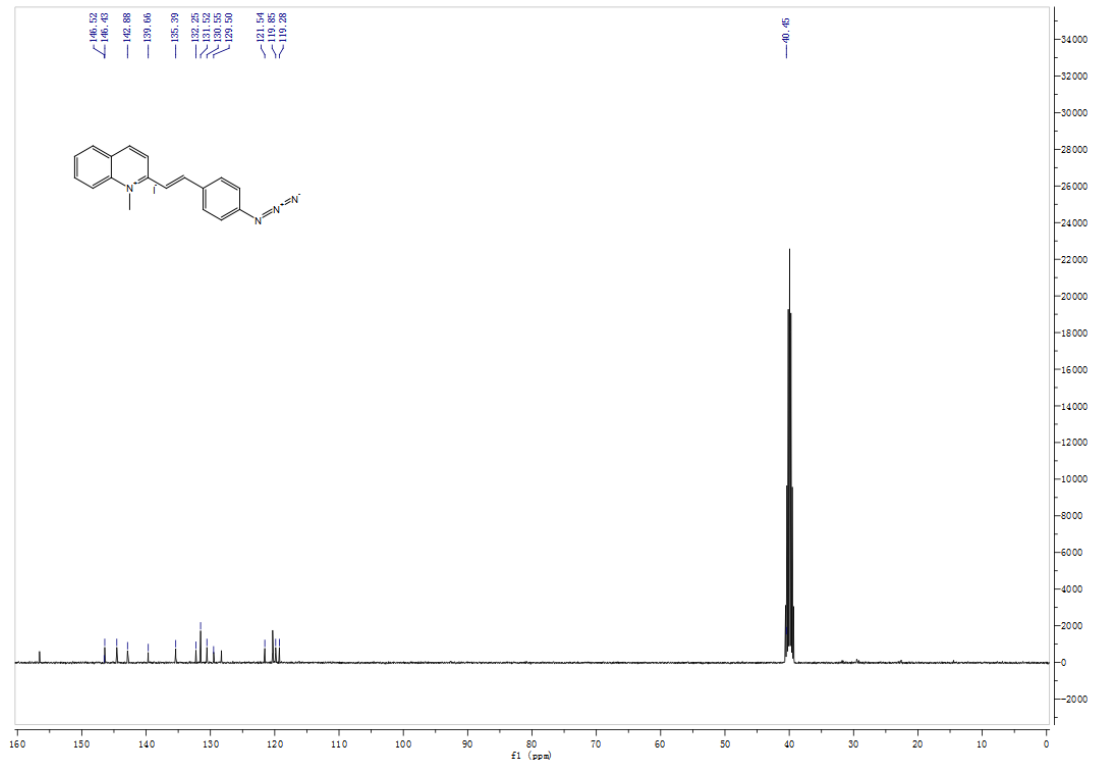

Supplement: d0nj04786d1.pdf [file d0nj04786d1.pdf]
